# Supplementary material for: Uniaxial and Coaxial Nanofibers PCL/Alginate or PCL/Gelatine Transport and Release Tamoxifen and Curcumin Affecting the Viability of MCF7 Cell Line
Source: MDPI journal article supplement (doi:10.3390/nano12193348), 2022-09-26
Supplement: s1 [file s1]

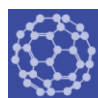

## Supplementary Materials

# Uniaxial and Coaxial Nanofibers PCL/Alginate or PCL/Gelatin Transport and Release Tamoxifen and Curcumin Affecting the Viability of MCF7 Cell Line

Diego Fernando Suárez <sup>1</sup>, Ana Delia Pinzón-García <sup>1</sup>, Rubén Darío Sinisterra <sup>1</sup>, Anderson Dussan <sup>2</sup>, Fredy Mesa <sup>2</sup> and Sandra Ramírez-Clavijo <sup>3,\*</sup>

<sup>1</sup> Chemistry Department, Instituto de Ciências Exatas, Universidade Federal de Minas Gerais, Av. Presidente Antônio Carlos 6627, Belo Horizonte 31270-901, MG, Brazil

<sup>2</sup> Departamento de Física, Grupo de Materiales Nanoestructurados y sus Aplicaciones, Universidad Nacional de Colombia, Bogotá 110011, Colombia

<sup>3</sup> Department of Biology, Grupo Ciencias Básicas Médicas, Faculty of Natural Science, Universidad del Rosario, Bogotá 110311, Colombia

\* Correspondence: sandra.ramirez@urosario.edu.co

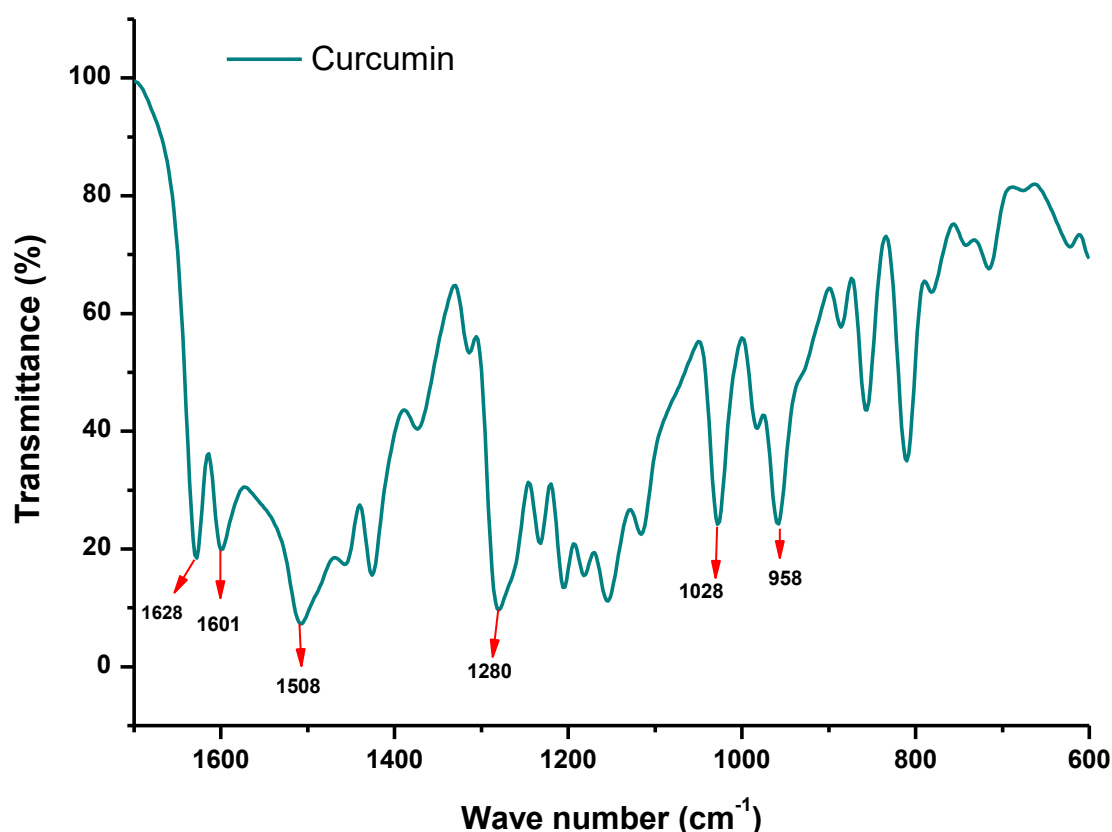

| 1628 cm <sup>-1</sup> | 1601 cm <sup>-1</sup> | 1508 cm <sup>-1</sup> | 1280 cm <sup>-1</sup> | 1028 cm <sup>-1</sup>        | 958 cm <sup>-1</sup> |
|-----------------------|-----------------------|-----------------------|-----------------------|------------------------------|----------------------|
| $\nu$ C=O, C=C        | $\nu$ C=C             | $\nu$ C=C; C=O        | $\nu$ C=CH            | $\nu$ C-C-H; CH <sub>3</sub> | $\nu$ C-O            |

Figure S1. IR spectrum of curcumin 1700–600 cm<sup>-1</sup>.

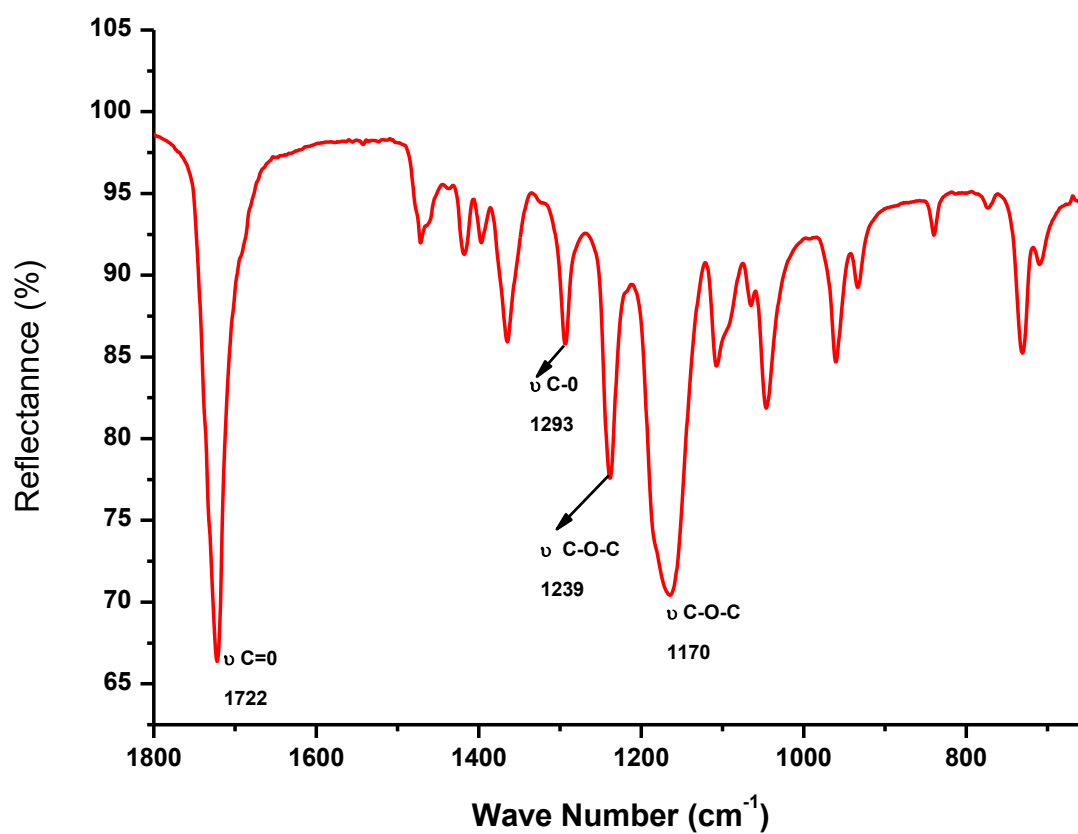

| 1722 cm <sup>-1</sup> | 1293 cm <sup>-1</sup> | 1239 cm <sup>-1</sup> | 1170 cm <sup>-1</sup> |
|-----------------------|-----------------------|-----------------------|-----------------------|
| $\nu$ C=O             | $\nu$ C-O             | $\nu$ C-O-C           | $\nu$ C-O-C           |

Figure S2. IR spectrum of polycaprolactone 1800–650 cm<sup>-1</sup>.
